# Supplementary material for: pathCHEMO, a generalizable computational framework uncovers molecular pathways of chemoresistance in lung adenocarcinoma
Source: PubMed Central journal article supplement (PMC6731276; doi:10.1038/s42003-019-0572-6), 2019-09-06
Supplement: 42003_2019_572_MOESM7_ESM.pdf [file 42003_2019_572_MOESM7_ESM.pdf]

**Editorial Note:** This manuscript has been previously reviewed at another journal. This document only contains reviewer comments and rebuttal letters for versions considered at *Communications Biology* .

REVIEWERS' COMMENTS:

Reviewer #1 (Remarks to the Author):

Authors have adequately addressed my concerns. I have no issues with it and recommend accept by *Communications Biology*.

Reviewer #2 (Remarks to the Author):

I think the authors have adressed all my previous concerns appropriately. I do think the manuscript has improved substantially and I am happy to see it in press.

|                                                                                                                                                                                                                                                                                                                                                                                                                             |                                                                                                    |
|-----------------------------------------------------------------------------------------------------------------------------------------------------------------------------------------------------------------------------------------------------------------------------------------------------------------------------------------------------------------------------------------------------------------------------|----------------------------------------------------------------------------------------------------|
| <p>REVIEWERS' COMMENTS:</p> <p>Reviewer #1 (Remarks to the Author):</p> <p>Authors have adequately addressed my concerns. I have no issues with it and recommend accept by Communications Biology.</p> <p>Reviewer #2 (Remarks to the Author):</p> <p>I think the authors have adressed all my previous concerns appropriately. I do think the manuscript has improved substantially and I am happy to see it in press.</p> | <p>We are genuinely thankful to the Reviewers for their favorable evaluation of our manuscript</p> |
|-----------------------------------------------------------------------------------------------------------------------------------------------------------------------------------------------------------------------------------------------------------------------------------------------------------------------------------------------------------------------------------------------------------------------------|----------------------------------------------------------------------------------------------------|
